# Supplementary material for: Spatially isolated neutral excitons via clusters on trilayer MoS2
Source: Royal Society of Chemistry journal article supplement (doi:10.1039/d2nr00391k), 2022-01-01
Supplement: d2nr00391k1.pdf [file d2nr00391k1.pdf]

## Supporting Information

# Spatially isolated neutral excitons via clusters on trilayer MoS<sub>2</sub>

*Cheolmin Park,<sup>a</sup> Seonghun Ahn,<sup>b</sup> Jun-Hwe Cha,<sup>a</sup> Woonggi Hong,<sup>a</sup> Hyeok Jun  
Jin,<sup>a</sup> Sang Yoon Yang,<sup>a</sup> Yong-Hoon Ch<sup>b</sup> and Sung-Yool Choi<sup>a\*</sup>*

<sup>a</sup> School of Electrical Engineering, Graphene/2D Materials Research Center, Center for  
Advanced Materials Discovery towards 3D Display, KAIST, Daehakro, Yuseong-gu,  
Daejeon, 34141, Republic of Korea

<sup>b</sup> Department of Physics, Korea Advanced Institute of Science and Technology (KAIST),  
Daejeon 34141, Republic of Korea

Keywords: non-radiative recombination; trion; exciton; MoS<sub>2</sub>; power-dependent  
photoluminescence

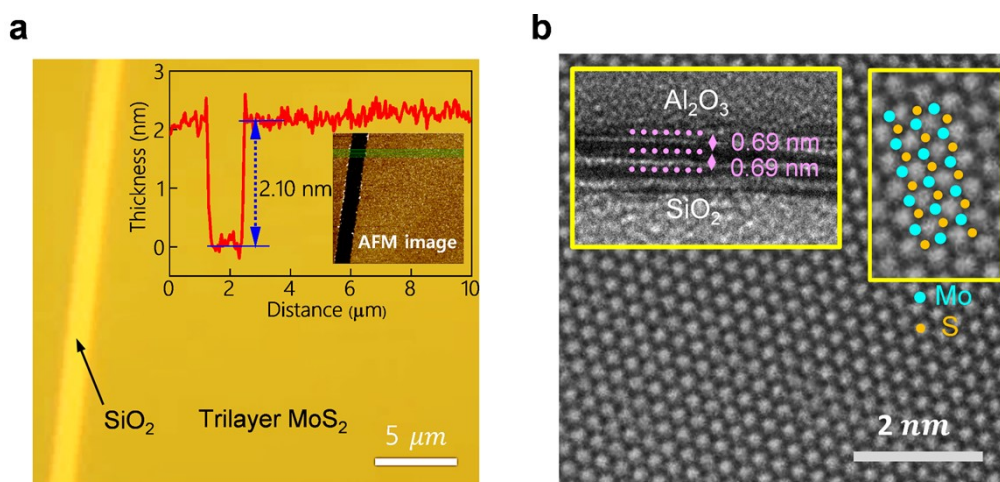

**Fig. S1** (a) Optical image of MOCVD grown trilayer MoS<sub>2</sub> on the SiO<sub>2</sub>/Si substrate. An inset shows AFM image with one dimensional thickness data. (b) Top view of HRTEM image. Cross sectional view present trilayed MoS<sub>2</sub> (left inset). Atomic positions of MoS<sub>2</sub> in the hexagonal structure of top view (right inset). The atoms corresponds to dark region in the hexagonal structure and the white dots is holes.

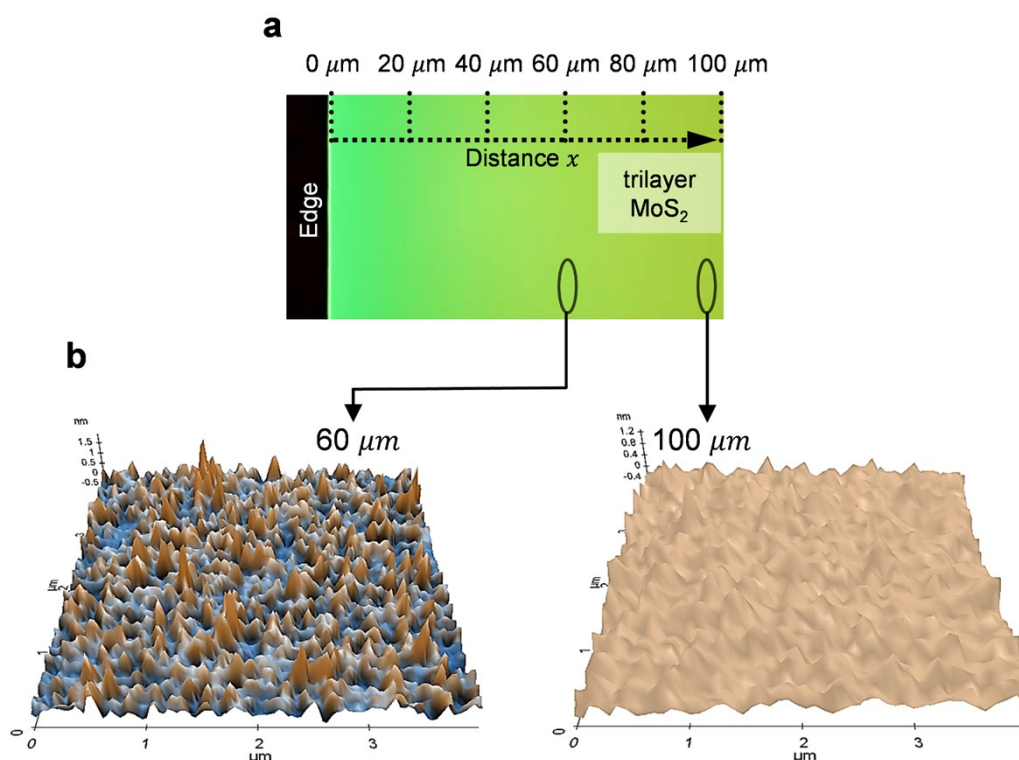

**Fig. S2** (a) Optical image of MOCVD-grown multilayered MoS<sub>2</sub> in the near edge of substrate, where the color varied from 0 to 100 μm. (b) The surface morphology at 60 μm and 100 μm, observed by AFM. While a lot of the protruding bumps over 0.6 nm in height were found at 60 μm, corresponding to the thickness of monolayer MoS<sub>2</sub>, the protruding bumps over 0.5 nm in height was rarely observed at 100 μm.

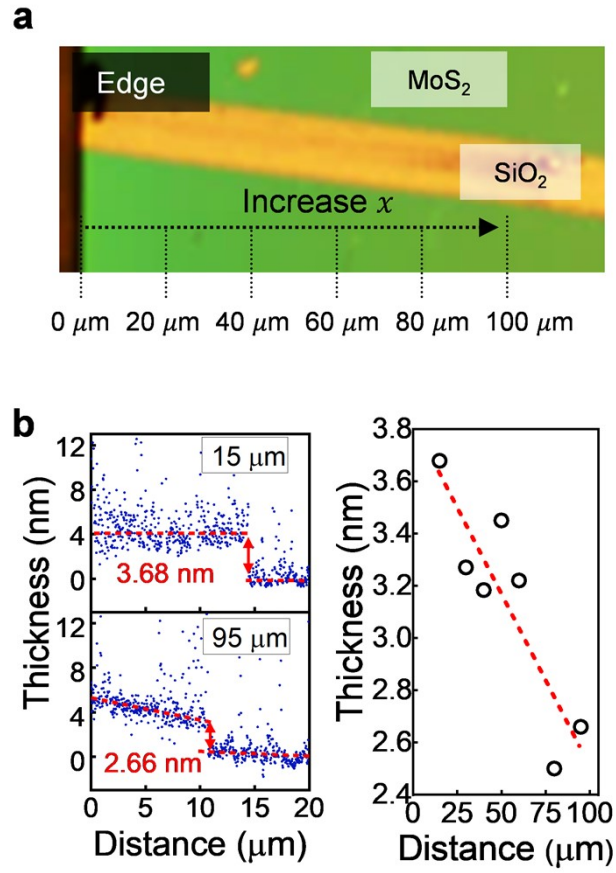

**Fig. S3** (a) Optical image of MOCVD-grown multilayered MoS<sub>2</sub> in the near edge of substrate. To measure thickness according to the distance, we made a long scratch. (b) The thickness of multilayer MoS<sub>2</sub> as a function of distance. Left graph shows one dimensional thickness data at 15  $\mu\text{m}$  and 95  $\mu\text{m}$ . Right graph present thickness information according to the distance, which is almost corresponding with Raman data.

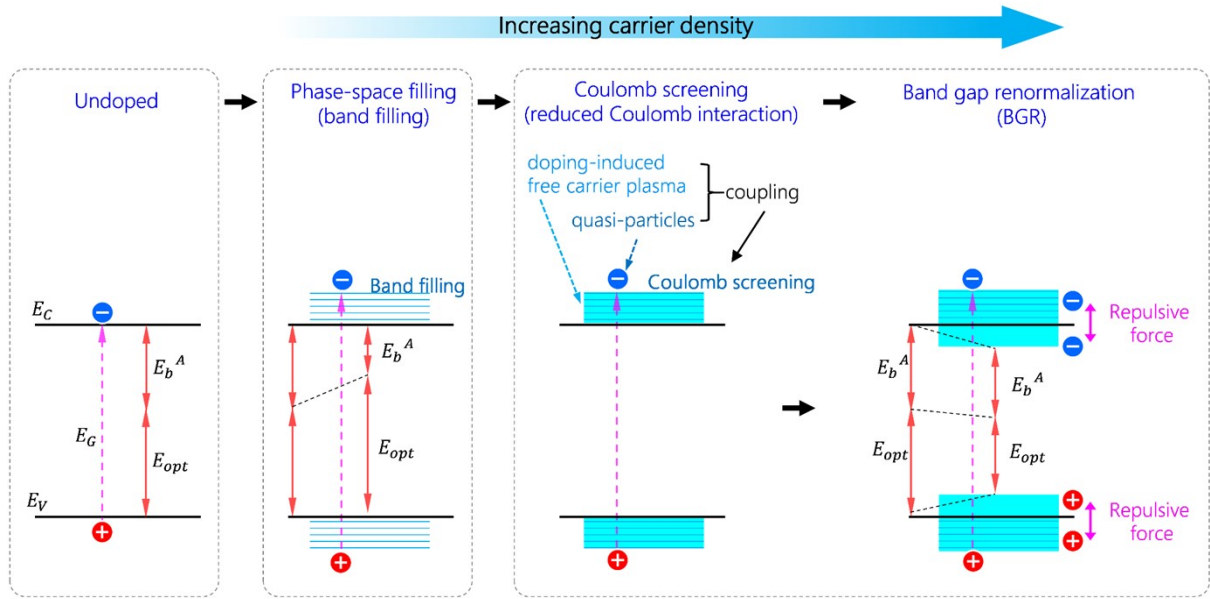

**Fig. S4** (a) Nonlinearity of carrier behavior according to carrier density in low-dimensional materials. Low-dimensional materials exhibiting low density of states (DOSs) reveals well the nonlinearity properties. The excited carrier can easily occupy the low DOSs, which is a phase-space filling (or simply, band filling), inducing the change of absorbance and emission spectra. With high carrier density, Coulomb screening and band gap renormalization (BGR) occur almost simultaneously because the Coulomb screening itself include the repulsive force between excited carries, which eventually results in the band gap reduction by BGR.
